# Supplementary material for: Different Recognition of Protein Features Depending on Deep Learning Models: A Case Study of Aromatic Decarboxylase UbiD
Source: MDPI journal article supplement (doi:10.3390/biology12060795), 2023-05-31
Supplement: s1 [file s1]

## Supplementary information

### Different recognition of protein features depending on deep learning models: a case study of aromatic decarboxylase UbiD

Naoki Watanabe<sup>†</sup>, Yuki Kuriya<sup>†</sup>, Masahiro Murata, Masaki Yamamoto, Masayuki Shimizu and Michihiro Araki<sup>\*</sup>

<sup>†</sup>These authors contributed equally to the work.

#### Supplementary Figures

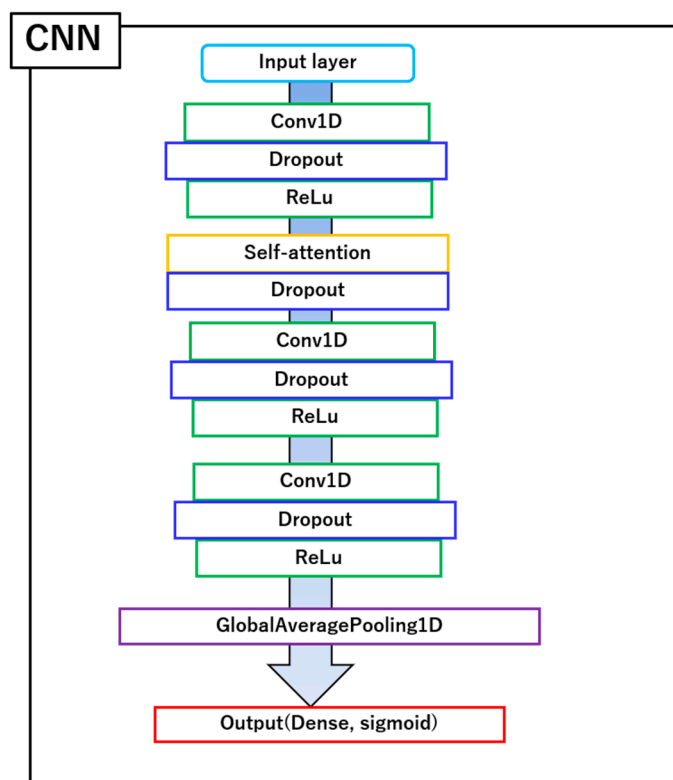

**Supplementary Figure S1.** CNN model architecture for predicting target enzymes.

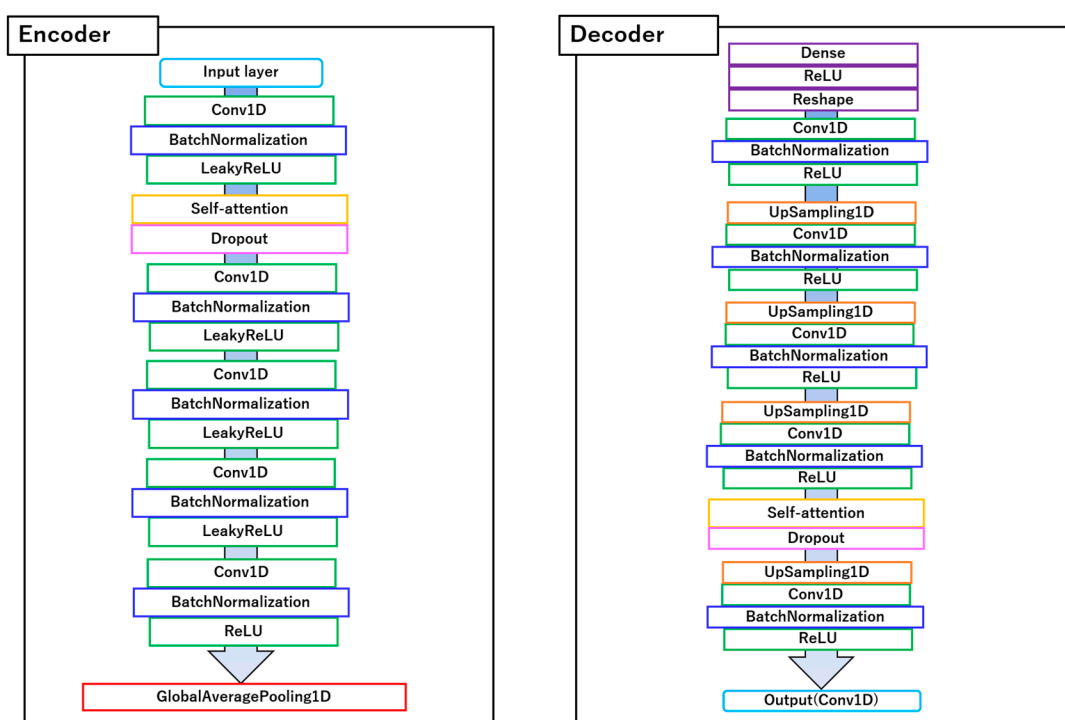

**Supplementary Figure S2.** CNN-AE model architecture for extracting target enzyme sequence features.

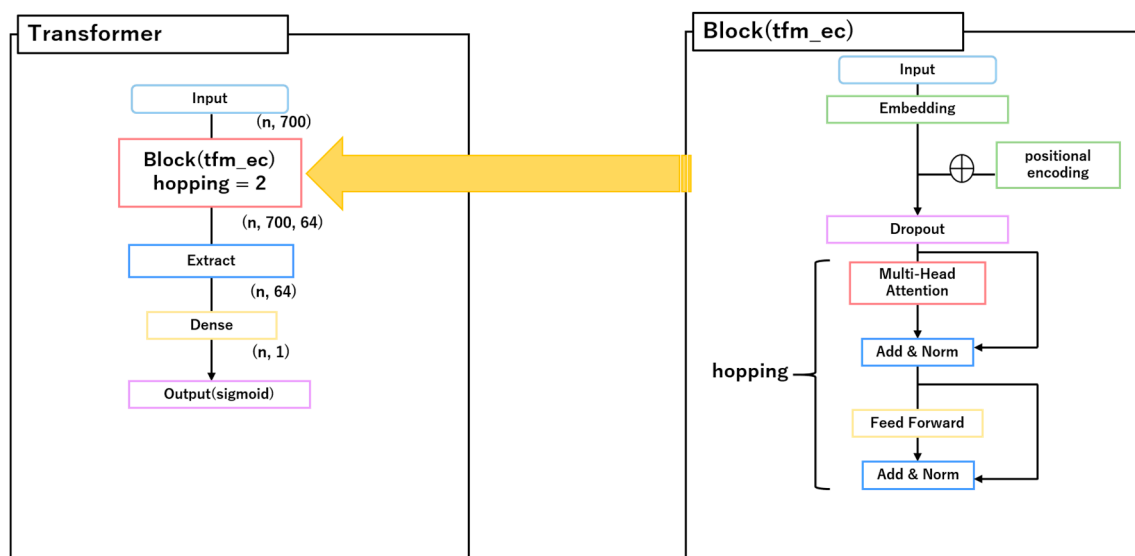

**Supplementary Figure S3.** Architecture of transformer model for predicting target enzymes and extracting target enzyme sequence features (left panel). The right panel shows Block (tfm\_ec) architecture in the encoder of transformer model [1].

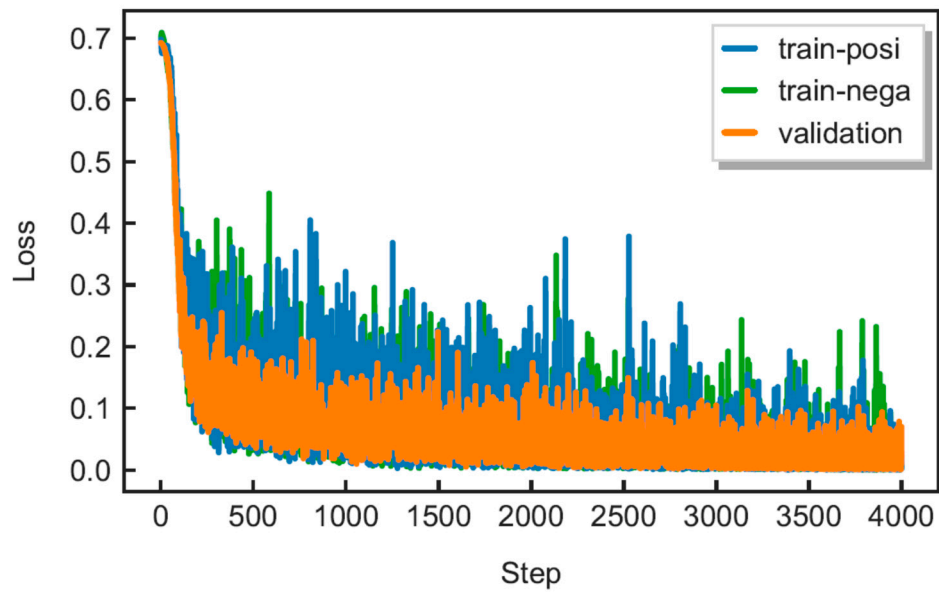

**Supplementary Figure S4.** Training for positive samples (blue line), training for negative samples (green line) and validation (orange line) loss curves of CNN model for 4,000 steps.

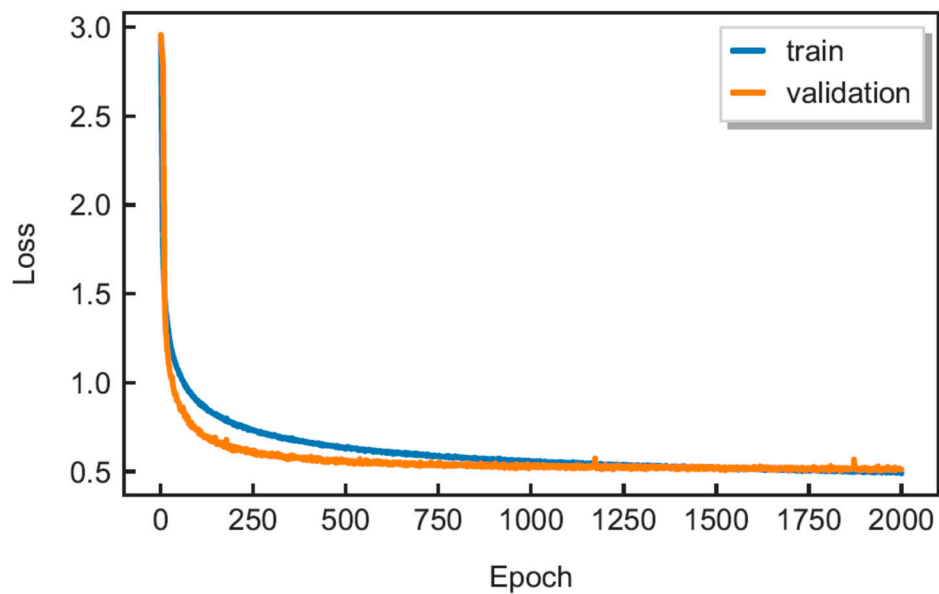

**Supplementary Figure S5.** Training (blue line) and validation (orange line) loss curves of CNN-AE model for 2,000 epochs.

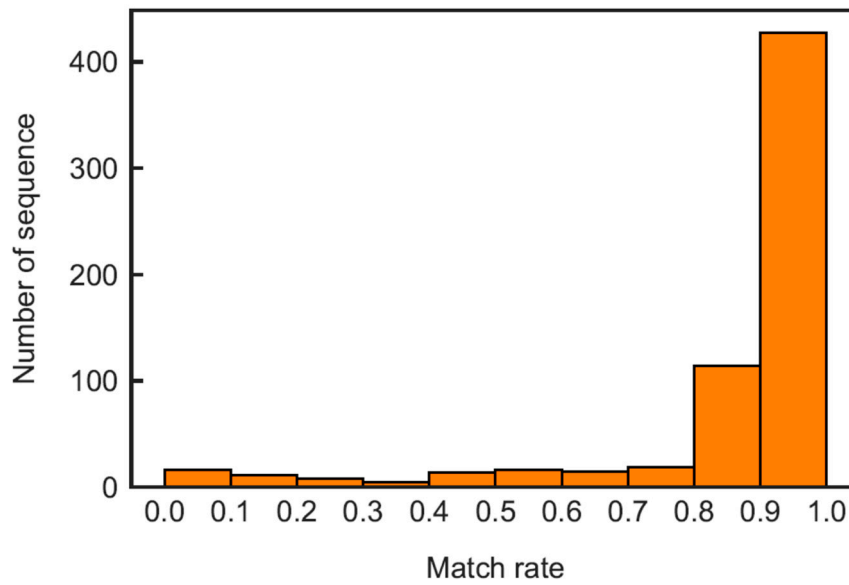

**Supplementary Figure S6.** Histogram of match rates between output sequences and input sequences using CNN-AE model in 2,000 epochs. The horizontal axis shows Match rate between the output sequences to the input sequences, while the vertical axis shows the number of the sequences.

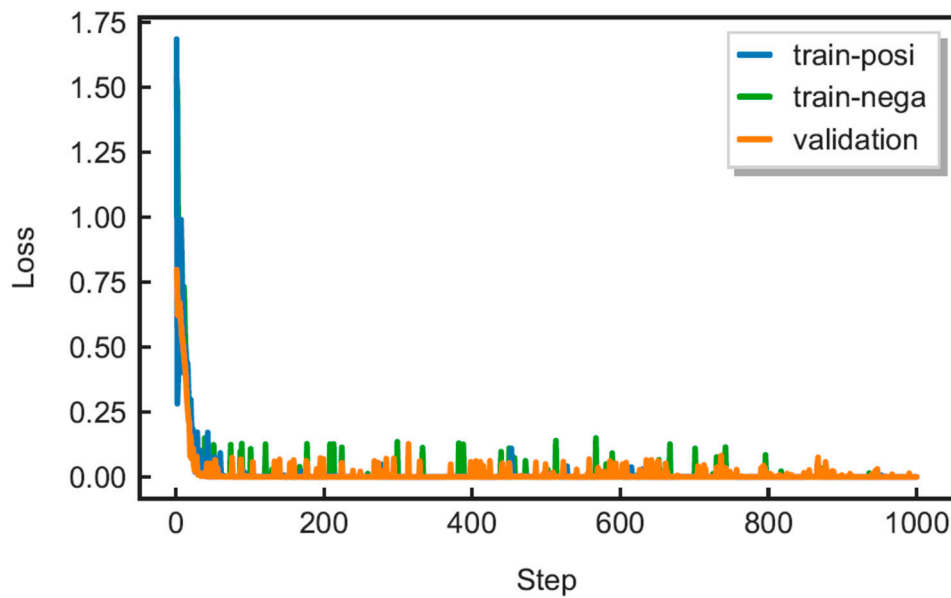

**Supplementary Figure S7.** Training for positive samples (blue line), training for negative samples (green line) and validation (orange line) loss curves of Transformer model for 1,000 steps.

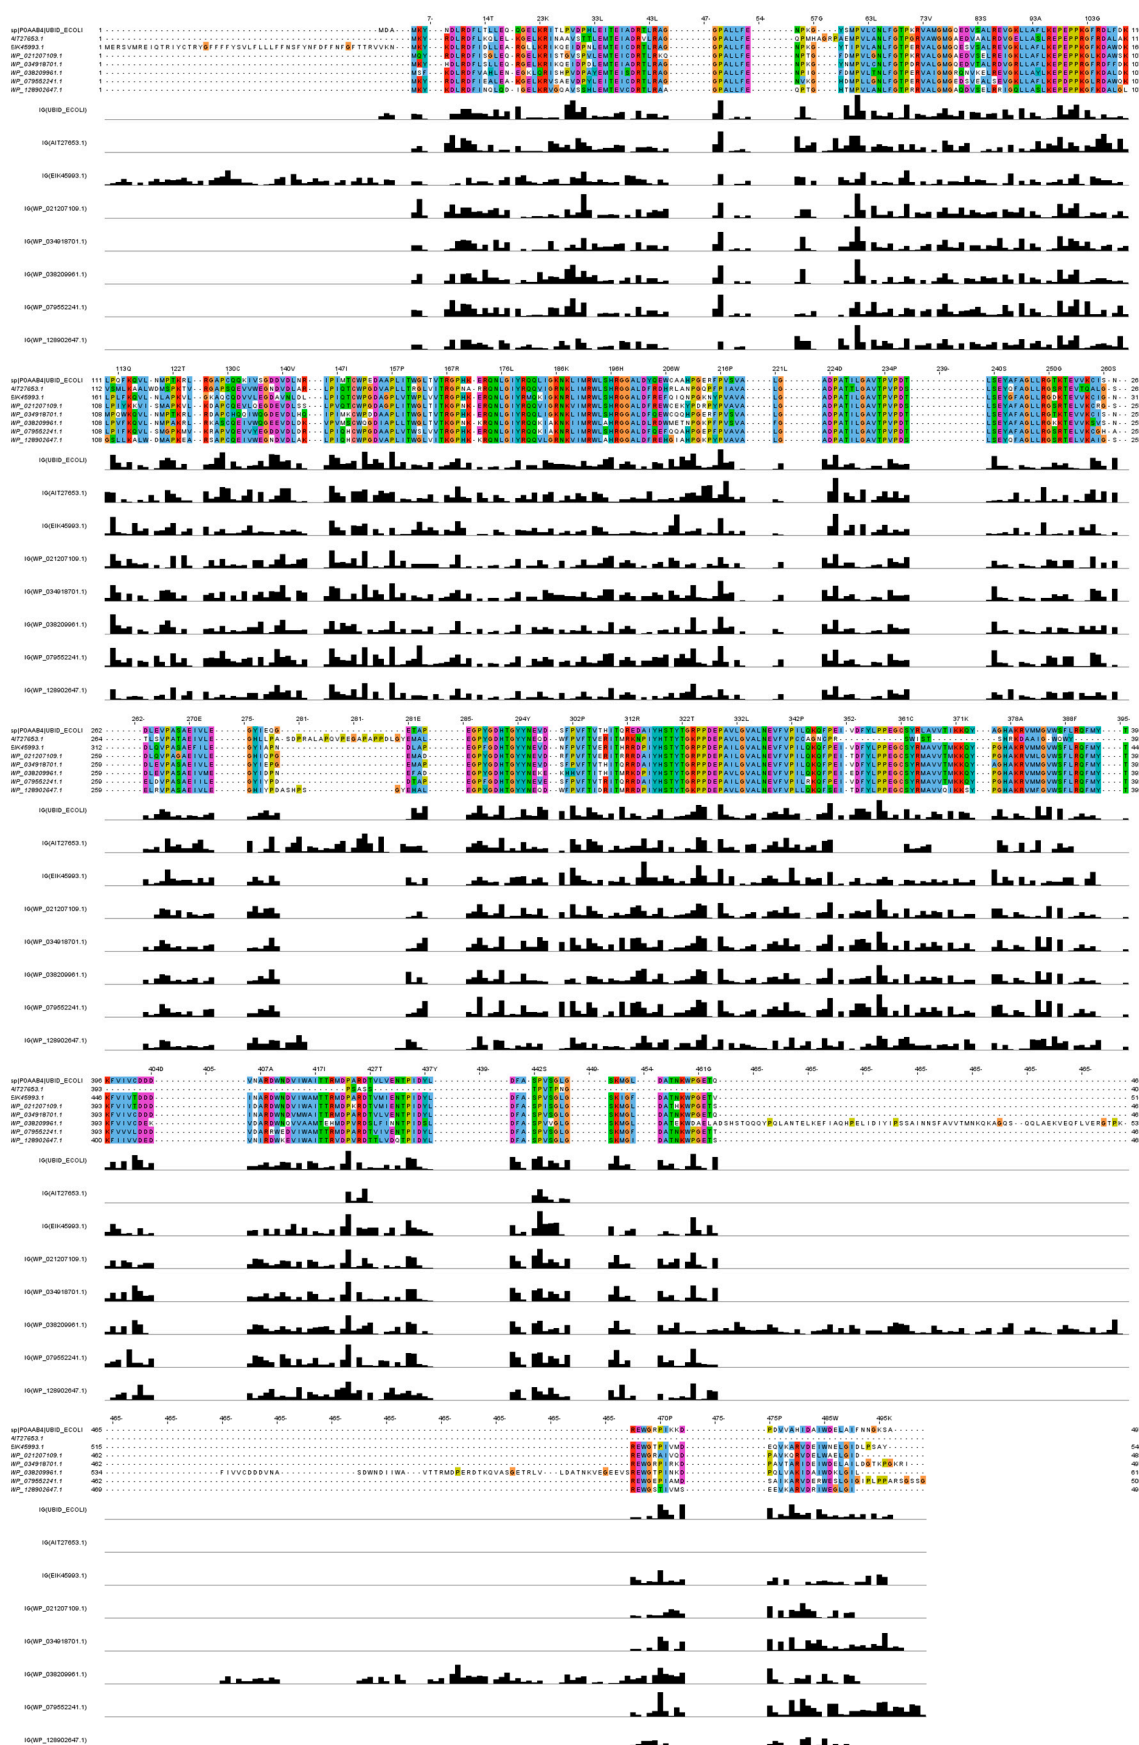

**Supplementary Figure S8.** Multiple sequence alignment for *Escherichia coli* UbiD (UBID\_ECOLI) and representative UbiD sequences (Table S2) and IG results of representative UbiD sequences derived from classification scores using CNN model. Bar charts show the IG values which are normalized between 0 and 1.



**Supplementary Figure S9.** Multiple sequence alignment for *E. coli* UbiD (UBID\_ECOLI) and representative UbiD sequences (Table S2) and IG results of representative UbiD sequences derived from feature vectors using CNN-AE model. Bar charts show the IG values which are normalized between 0 and 1.



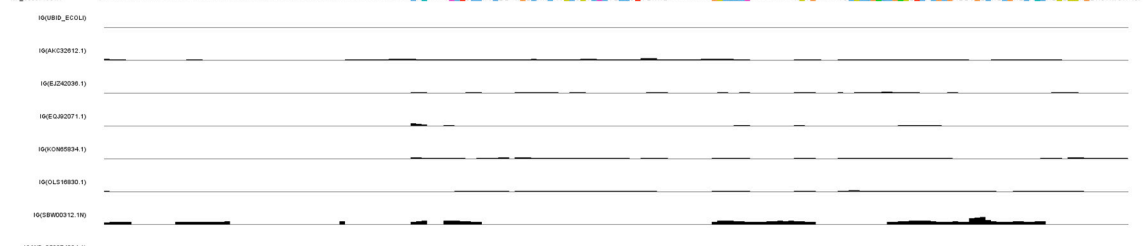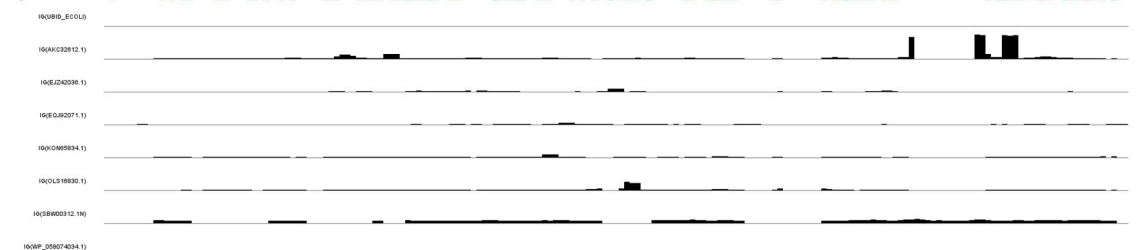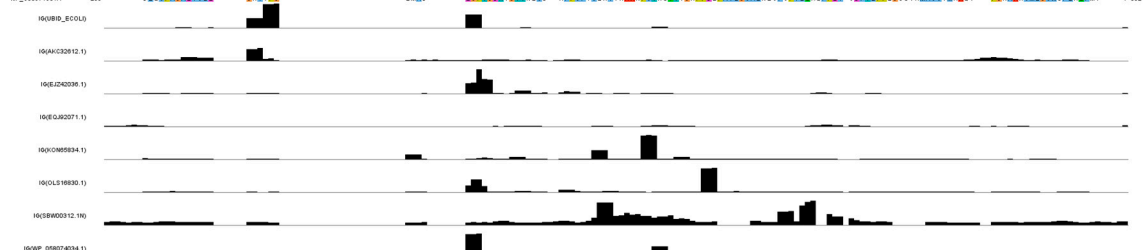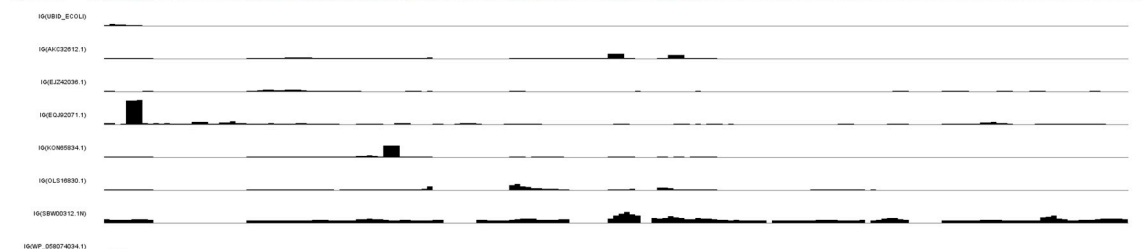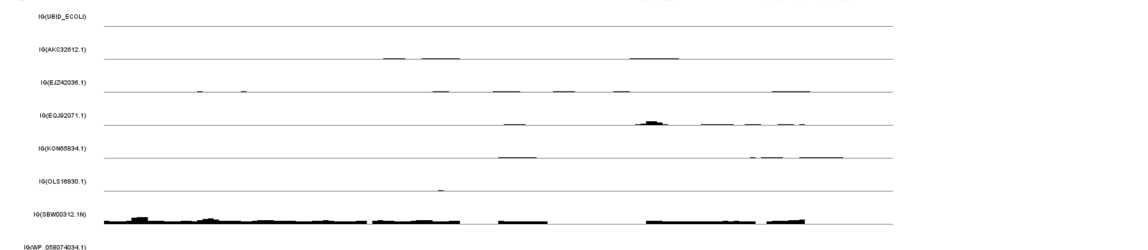

**Supplementary Figure S10.** Multiple sequence alignment for *E. coli* UbiD (UBID\_ECOLI) and representative UbiD sequences (Table S2) and IG results of representative UbiD sequences derived from feature vectors using Transformer model. Bar charts show the IG values which are normalized between 0 and 1.

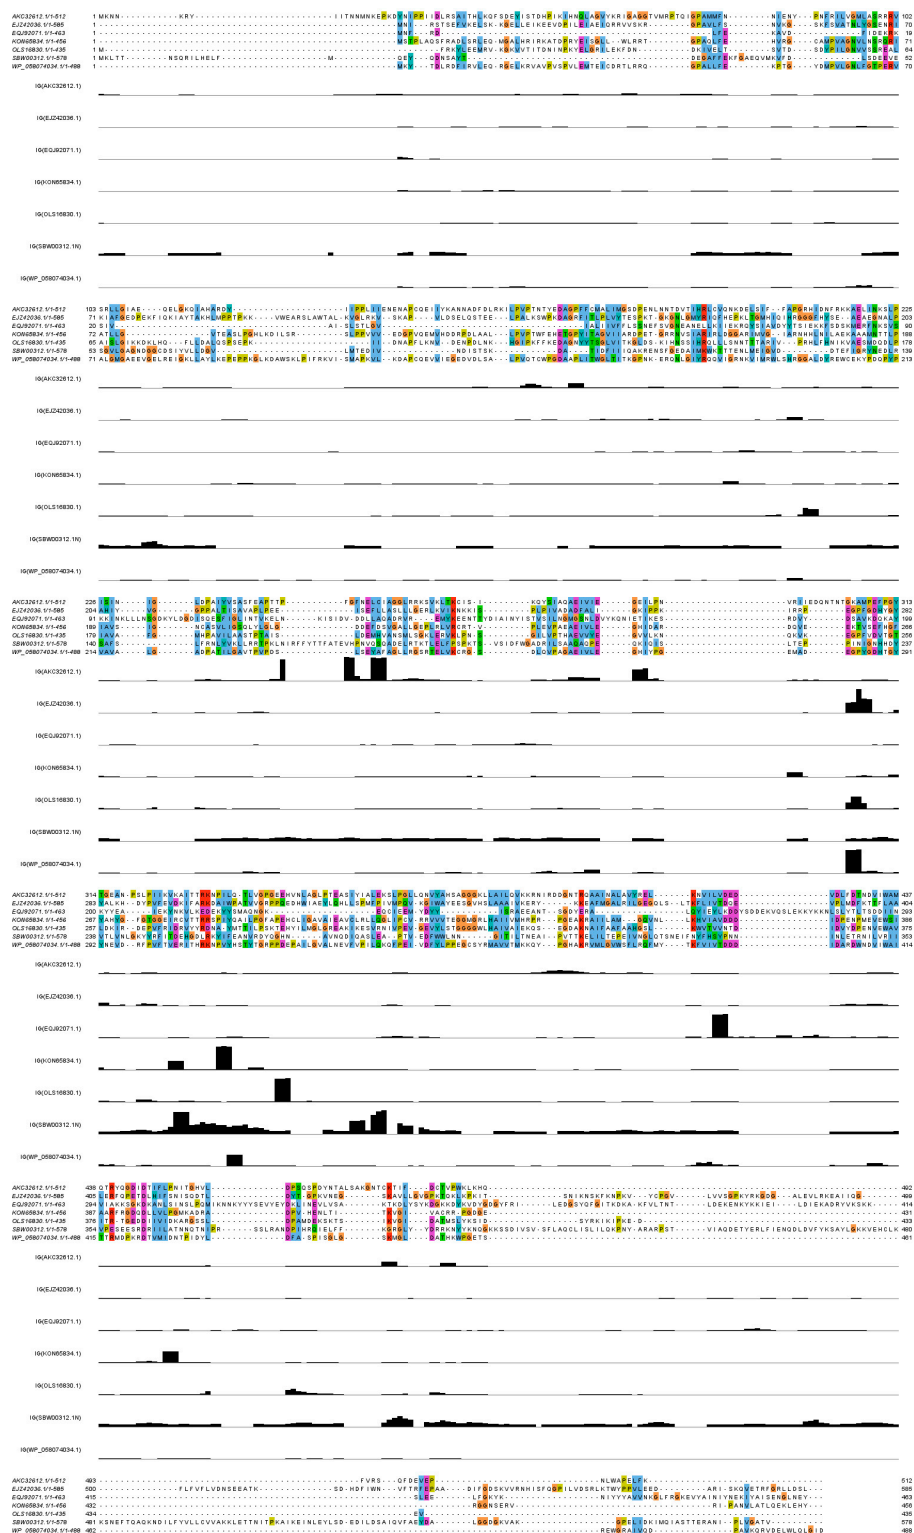

**Supplementary Figure S11.** Multiple sequence alignment for *E. coli* UbiD (UBID\_ECOLI) and representative UbiD sequences (Table S2) and IG results of representative UbiD sequences derived from classification scores using Transformer model. Bar charts show the IG values which are normalized between 0 and 1.

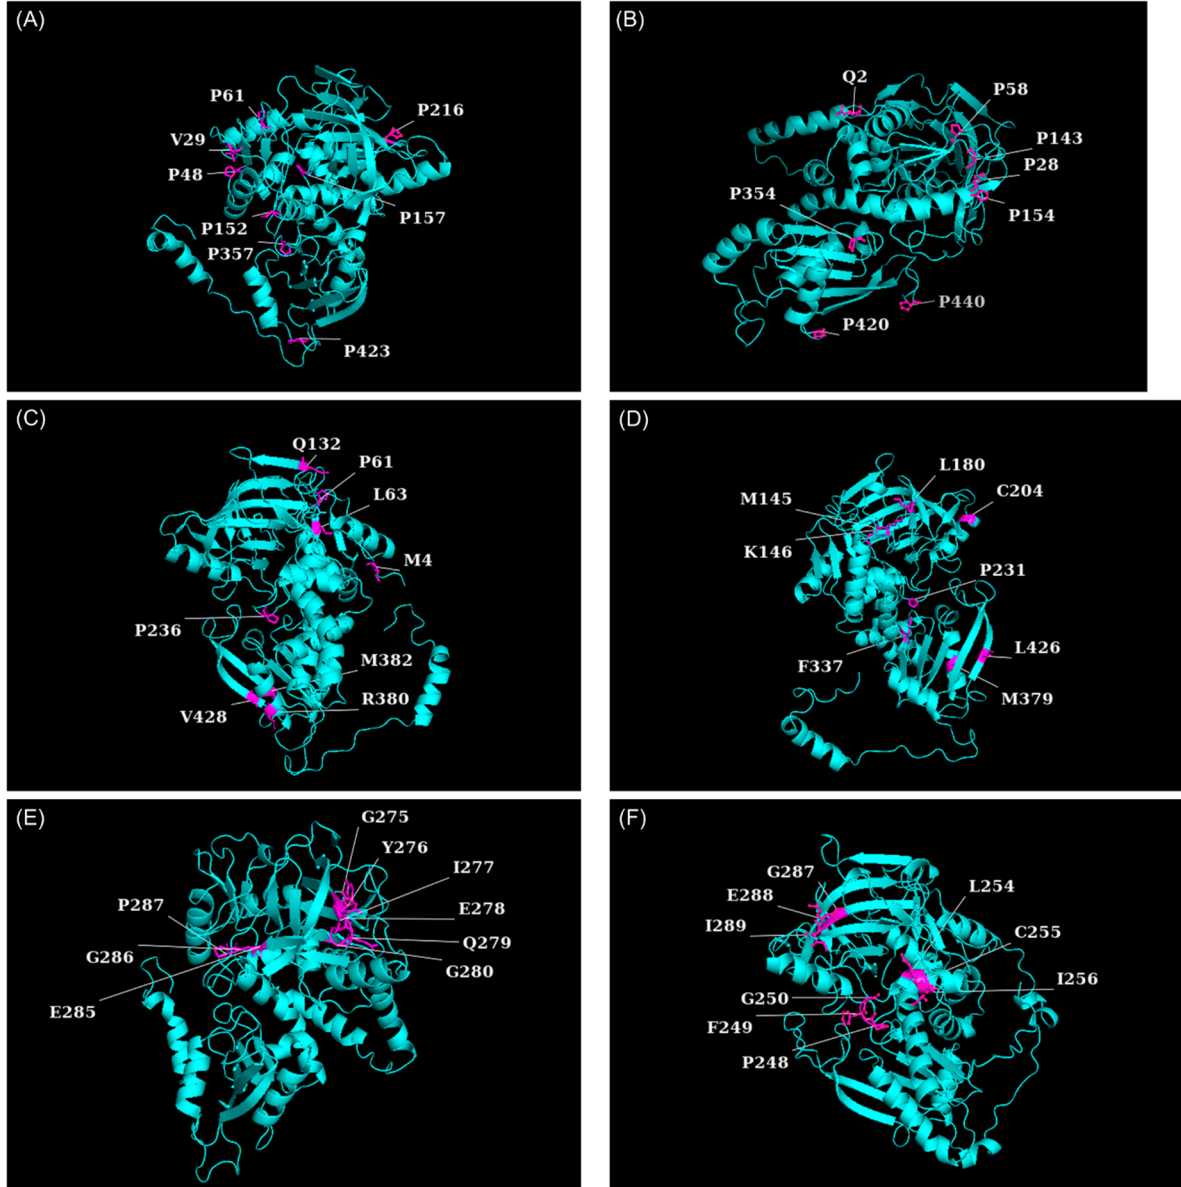

**Supplementary Figure S12.** UbiD structures using ESMFold [2] structure prediction and IG results. The structures were visualized by Pymol [3]. The residues with higher IG values are shown in magentas. (A) *E. coli* UbiD results using CNN model, (B) WP\_021207109.1 results using CNN model, (C) *E. coli* UbiD results using CNN-AE model, (D) WP\_034918701.1 results using CNN-AE model, (E) *E. coli* UbiD results using Transformer 1 model and (F) AKC32612.1 results using CNN-AE model. The

residue numbers of (B), (D) and (F) figures are of each sequence not *E. coli* UbiD.

## Supplementary Table

**Supplementary Table S1.** Test evaluations for CNN and Transformer models.

| CNN      |       |       |                      |        |
|----------|-------|-------|----------------------|--------|
| Step No. | ACC   | AUC   | F <sub>1</sub> score | MCC    |
| 100      | 0.500 | 0.967 | 0.000                | -0.008 |
| 500      | 0.942 | 0.991 | 0.917                | 0.911  |
| 1,000    | 0.963 | 0.994 | 0.935                | 0.930  |
| 1,500    | 0.969 | 0.995 | 0.954                | 0.950  |
| 2,000    | 0.978 | 0.996 | 0.968                | 0.965  |
| 2,500    | 0.986 | 0.996 | 0.975                | 0.973  |
| 3,000    | 0.976 | 0.997 | 0.970                | 0.968  |
| 3,500    | 0.992 | 0.997 | 0.975                | 0.974  |
| 4,000    | 0.993 | 0.997 | 0.982                | 0.981  |

  

| Transformer |       |       |                      |       |
|-------------|-------|-------|----------------------|-------|
| Step No.    | ACC   | AUC   | F <sub>1</sub> score | MCC   |
| 100         | 0.997 | 0.999 | 0.994                | 0.993 |
| 200         | 0.996 | 0.999 | 0.992                | 0.992 |
| 300         | 0.998 | 0.999 | 0.995                | 0.995 |
| 400         | 0.998 | 0.999 | 0.996                | 0.996 |
| 500         | 0.998 | 0.999 | 0.997                | 0.997 |
| 600         | 0.998 | 0.998 | 0.997                | 0.997 |
| 700         | 0.998 | 0.998 | 0.996                | 0.996 |
| 800         | 0.997 | 0.998 | 0.996                | 0.996 |
| 900         | 0.997 | 0.999 | 0.997                | 0.997 |
| 1,000       | 0.998 | 0.999 | 0.998                | 0.997 |

**Supplementary Table S2.** Representative sequences selected from each cluster derived from clustering by feature vectors of CNN-AE and Transformer models.

| CNN-AE         |                                       |                                              |
|----------------|---------------------------------------|----------------------------------------------|
| Accession No.  | Strain                                | Annotation                                   |
| AIT27653.1     | <i>Bordetella holmesii</i> 44057      | ubiD decarboxylase family protein            |
| EIK45993.1     | <i>Cellvibrio</i> sp. BR              | 3-octaprenyl-4-hydroxybenzoate carboxy-lyase |
| WP_021207109.1 | <i>Pseudomonas stutzeri</i>           | 4-hydroxy-3-polyprenylbenzoate decarboxylase |
| WP_034918701.1 | <i>Erwinia</i> sp. 9145               | 4-hydroxy-3-polyprenylbenzoate decarboxylase |
| WP_038209961.1 | <i>Vibrio tubiashii</i>               | 4-hydroxy-3-polyprenylbenzoate decarboxylase |
| WP_079552241.1 | <i>Halomonas subglaciescola</i>       | 4-hydroxy-3-polyprenylbenzoate decarboxylase |
| WP_128902647.1 | <i>Janthinobacterium</i> sp. 17J80-10 | 4-hydroxy-3-polyprenylbenzoate decarboxylase |

  

| Transformer    |                                                   |                                              |
|----------------|---------------------------------------------------|----------------------------------------------|
| Accession No.  | Strain                                            | Description                                  |
| AKC32612.1     | <i>Candidatus Pantoea carbekii</i>                | 3-octaprenyl-4-hydroxybenzoate carboxy-lyase |
| EJZ42036.1     | <i>Leptospira licerasiae</i> str. MMD4847         | UbiD family decarboxylase                    |
| EQJ92071.1     | <i>Clostridioides difficile</i> P50               | ubiD family decarboxylase                    |
| KON65834.1     | <i>Komagataeibacter europaeus</i>                 | 3-octaprenyl-4-hydroxybenzoate carboxy-lyase |
| OLS16830.1     | <i>Candidatus Heimdallarchaeota archaeon LC_2</i> | 3-octaprenyl-4-hydroxybenzoate carboxy-lyase |
| SBW00312.1     | uncultured Clostridiales bacterium                | UbiD family decarboxylase                    |
| WP_058074034.1 | <i>Pseudomonas</i>                                | 4-hydroxy-3-polyprenylbenzoate decarboxylase |

**Supplementary Table S3.** Euclidean distances of feature vectors and bitscores using BLASTp, Basic Local Alignment Search Tool [4] between *E. coli* UbiD and each representative sequence derived from CNN-AE and Transformer models.

| CNN-AE         |                         |                 |
|----------------|-------------------------|-----------------|
| Accession No.  | Feature vector distance | BLASTp bitscore |
| AIT27653.1     | 2.879                   | 459             |
| EIK45993.1     | 2.914                   | 808             |
| WP_021207109.1 | 3.994                   | 796             |
| WP_034918701.1 | 4.003                   | 931             |
| WP_038209961.1 | 3.183                   | 744             |
| WP_079552241.1 | 4.103                   | 783             |
| WP_128902647.1 | 3.475                   | 725             |

| Transformer    |                         |                 |
|----------------|-------------------------|-----------------|
| Accession No.  | Feature vector distance | BLASTp bitscore |
| WP_058074034.1 | 0.72                    | 792             |
| KON65834.1     | 2.11                    | 142             |
| EQJ92071.1     | 3.95                    | 22.3            |
| EJZ42036.1     | 4.06                    | 216             |
| OLS16830.1     | 7.27                    | 136             |
| AKC32612.1     | 10.12                   | 119             |
| SBW00312.1     | 15.72                   | 17.7            |

**Supplementary Table S4.** All euclidean distances of feature vectors between 2 sequences for representative sequences derived from (A) CNN-AE and (B) Transformer models.

| CNN-AE         | AIT27653.1 | EIK45993.1 | WP_021207109.1 | WP_034918701.1 | WP_038209961.1 | WP_079552241.1 | WP_128902647.1 |
|----------------|------------|------------|----------------|----------------|----------------|----------------|----------------|
| AIT27653.1     | 0.000      | 1.864      | 4.360          | 4.424          | 3.006          | 4.164          | 3.146          |
| EIK45993.1     | 1.864      | 0.000      | 4.661          | 4.652          | 2.978          | 4.271          | 3.242          |
| WP_021207109.1 | 4.360      | 4.661      | 0.000          | 2.944          | 3.594          | 2.994          | 3.589          |
| WP_034918701.1 | 4.424      | 4.652      | 2.944          | 0.000          | 3.646          | 3.216          | 3.705          |
| WP_038209961.1 | 3.006      | 2.978      | 3.594          | 3.646          | 0.000          | 3.587          | 3.059          |
| WP_079552241.1 | 4.164      | 4.271      | 2.994          | 3.216          | 3.587          | 0.000          | 3.399          |
| WP_128902647.1 | 3.146      | 3.242      | 3.589          | 3.705          | 3.059          | 3.399          | 0.000          |

  

| Transformer    | AKC32612.1 | EJZ42036.1 | EQJ92071.1 | KON65834.1 | OLS16830.1 | SBW00312.1 | WP_058074034.1 |
|----------------|------------|------------|------------|------------|------------|------------|----------------|
| AKC32612.1     | 0.000      | 10.826     | 8.155      | 9.518      | 8.995      | 12.242     | 10.130         |
| EJZ42036.1     | 10.826     | 0.000      | 6.877      | 4.930      | 5.478      | 15.282     | 4.500          |
| EQJ92071.1     | 8.155      | 6.877      | 0.000      | 3.170      | 8.306      | 15.196     | 3.702          |
| KON65834.1     | 9.518      | 4.930      | 3.170      | 0.000      | 7.099      | 15.653     | 2.222          |
| OLS16830.1     | 8.995      | 5.478      | 8.306      | 7.099      | 0.000      | 13.844     | 7.615          |
| SBW00312.1     | 12.242     | 15.282     | 15.196     | 15.653     | 13.844     | 0.000      | 15.699         |
| WP_058074034.1 | 10.130     | 4.500      | 3.702      | 2.222      | 7.615      | 15.699     | 0.000          |

**Supplementary Table S5.** The results of the correlations between IG scores for each model and sequence conservation of UbiD *E. coli* [5]. The values are average correlation coefficients of UbiD *E. coli* and representative UbiD sequences. The correlation coefficients are Spearman's rank correlation coefficient.

| Model         | Correlation coefficient | Model         | Correlation coefficient |
|---------------|-------------------------|---------------|-------------------------|
| CNN           | -0.088                  | CNN-AE        | -0.038                  |
| Transformer 1 | 0.019                   | Transformer 2 | 0.012                   |

## Reference

- [1] Vaswani, A.; Shazeer, N.; Parmar, N.; Uszkoreit, J.; Jones, L.; Gomez, A. N.; Kaiser, Ł.; Polosukhin, I. Attention Is All You Need. In Proceeding of the

Advances in Neural Information Processing Systems 30, California, USA, 4-9 December 2017.

- [2] Lin Z, Akin H, Rao R, Hie B, Zhu Z, Lu W, et al. Evolutionary-scale prediction of atomic-level protein structure with a language model. *Science* **2023**, 379, 1123–1130. <https://doi.org/10.1126/science.ade2574>.
- [3] The PyMOL Molecular Graphics System, Version 2.0 Schrödinger, LLC. Available online: <https://pymol.org/2/> (accessed on 15 May 2023)
- [4] Camacho C, Coulouris G, Avagyan V, Ma N, Papadopoulos J, Bealer K, et al. BLAST+: architecture and applications. *BMC Bioinformatics* **2009**, 10, 421. <https://doi.org/10.1186/1471-2105-10-421>.
- [5] Jacewicz A, Izumi A, Brunner K, Schnell R, Schneider G. Structural Insights into the UbiD Protein Family from the Crystal Structure of PA0254 from *Pseudomonas aeruginosa*. *PLoS One* **2013**, 8, 1-10. <https://doi.org/10.1371/journal.pone.0063161>.
