# Supplementary material for: Different Recognition of Protein Features Depending on Deep Learning Models: A Case Study of Aromatic Decarboxylase UbiD
Source: Biology (Basel). 2023 May 31;12(6):795. doi: 10.3390/biology12060795 (PMC10295083; doi:10.3390/biology12060795)
Supplement: Supplementary file 1 [file biology-12-00795-s001.zip › Supplemental_information.xlsx]

## Sheet: IG_values
Supplemental Sheet S1. Escherichia coli UbiD secondary structures, conserved residues, ligand binding, active sites and IG results for all UbiD sequences using each model.
		Helix			Sheet / Strand		Underline	Semi-conserved		Bold	Conserved		Italic	Binding and active sites		-	Gap
CNN
UBID_ECOLI Residues	-	-	-	-	-	-	-	-	-	-	-	-	-	-	-	-	-	-	-	-	-	-	-	-	-	-	-	-	-	-	-	-	-	-	-	-	-	-	-	-	-	-	-	-	-	-	-	-	-
No.	-	-	-	-	-	-	-	-	-	-	-	-	-	-	-	-	-	-	-	-	-	-	-	-	-	-	-	-	-	-	-	-	-	-	-	-	-	-	-	-	-	-	-	-	-	-	-	-	-
sp|P0AAB4|UBID_ECOLI
AIT27653.1
EIK45993.1	0.0455193	0.081731	0.127537	0.274443	0.129655	0.0162698	0.120513	0.0152611	0.161813	0.266667	0.135893	0.228541	0.205109	0.240633	0.306129	0.156314	0.0540955	0.195561	0.0218211	0.208102	0.310391	0.373204	0.610768	0.258167	0.272486	0.111982	0.122245	0.0510165	0.0148707	0.0442465	0.0604098	0.26883	0.327901	0.00615843	0.461706	0.234077	0.0887821	0.130837	0.285118	0.152851	0.196684	0.00160149	0.115404	0.202834	0.0227924	0.164152	0.308956	0.0982437	0.315641
WP_021207109.1
WP_034918701.1
WP_038209961.1
WP_079552241.1
WP_128902647.1
CNN-AE
UBID_ECOLI Residues	-	-	-	-	-	-	-	-	-	-	-	-	-	-	-	-	-	-	-	-	-	-	-	-	-	-	-	-	-	-	-	-	-	-	-	-	-	-	-	-	-	-	-	-	-	-	-	-	-
No.	-	-	-	-	-	-	-	-	-	-	-	-	-	-	-	-	-	-	-	-	-	-	-	-	-	-	-	-	-	-	-	-	-	-	-	-	-	-	-	-	-	-	-	-	-	-	-	-	-
sp|P0AAB4|UBID_ECOLI
AIT27653.1
EIK45993.1	0.251607	0.191346	0.191913	0.248797	0.255087	0.217954	0.311075	0.259855	0.411973	0.257367	0.379516	0.321939	0.346219	0.639399	0.656573	0.391108	0.571812	0.435126	0.839235	0.244427	0.493481	0.306048	0.323871	0.560253	0.209867	0.221126	0.448772	0.378782	0.346688	0.509753	0.317687	0.402533	0.269429	0.24183	0.238738	0.325429	0.387931	0.318244	0.25188	0.327582	0.290296	0.347972	0.293107	0.278093	0.426542	0.458128	0.39438	0.212853	0.371182
WP_021207109.1
WP_034918701.1
WP_038209961.1
WP_079552241.1
WP_128902647.1
Transformer 1
UBID_ECOLI Residues	-	-	-	-	-	-	-	-	-	-	-	-	-	-	-	-	-	-	-	-	-	-	-	-	-	-	-	-	-	-	-	-	-	-	-	-	-	-	-	-	-	-	-	-	-	-	-	-	-
No.	-	-	-	-	-	-	-	-	-	-	-	-	-	-	-	-	-	-	-	-	-	-	-	-	-	-	-	-	-	-	-	-	-	-	-	-	-	-	-	-	-	-	-	-	-	-	-	-	-
sp|P0AAB4|UBID_ECOLI
AKC32612.1	0.0561874	0.0487294	0.044608	0.039527												0.0382412	0.0427132	0.0406297																											0.0455451	0.042478	0.0449041	0.0380574	0.0373691
EJZ42036.1
EQJ92071.1
KON65834.1
OLS16830.1	0.037657
SBW00312.1	0.0996144	0.10842	0.108924	0.113838	0.113903									0.116829	0.111354	0.109569	0.109873	0.116989	0.116065	0.111314	0.112537	0.122883	0.125526																					0.128893
WP_058074034.1
Transformer 2
UBID_ECOLI Residues	-	-	-	-	-	-	-	-	-	-	-	-	-	-	-	-	-	-	-	-	-	-	-	-	-	-	-	-	-	-	-	-	-	-	-	-	-	-	-	-	-	-	-	-	-	-	-	-	-
No.	-	-	-	-	-	-	-	-	-	-	-	-	-	-	-	-	-	-	-	-	-	-	-	-	-	-	-	-	-	-	-	-	-	-	-	-	-	-	-	-	-	-	-	-	-	-	-	-	-
sp|P0AAB4|UBID_ECOLI
AKC32612.1	0.0695459	0.0407532	0.0301823	0.0118887												0.0108309	0.0111287	0.00917508																											0.0112087	0.010805	0.0128059	0.0109862	0.0145337
EJZ42036.1
EQJ92071.1
KON65834.1
OLS16830.1	0.0629877
SBW00312.1	0.0666188	0.0751553	0.076517	0.0835371	0.0857496									0.0874948	0.0811502	0.0776251	0.0758846	0.0790439	0.0780739	0.0766805	0.0781732	0.0789432	0.078099																					0.0773193
WP_058074034.1
[truncated: 817 more columns]
